# Supplementary material for: RuNi single-atom alloy anchored on rGO as an outstanding bifunctional catalyst for efficient electrochemical water splitting
Source: Royal Society of Chemistry journal article supplement (doi:10.1039/d3nj05436e), 2024-01-01
Supplement: d3nj05436e1.pdf [file d3nj05436e1.pdf]

## Supplementary material

### 1. Experimental Section: Synthesis of RuNi@rGO, Ru@rGO and Ni@rGO

Briefly, the fresh graphene oxide 50 mg was dispersed in 5ml deionized water and sonicated for 2h.  $\text{NiCl}_2 \cdot 6\text{H}_2\text{O}$  (0.06 mmol) chemicals were prepared into 10 mg/ml solution. They were stirred for 1 h until the mixture were dispersed fully. Afterward, stirring vigorously at room temperature for 12h. 150  $\mu\text{L}$   $\text{RuCl}_3 \cdot 3\text{H}_2\text{O}$  was dispersed into 10 mg/mL aqueous solution and slowly added dropwise, with violently magnetically stirred for 5h. Then add saturated sodium borohydride, acting as a reducing agent to the solution and keep stirring for 5 h. After reaction, the product was collected by centrifugation, washed with deionized water several times and finally the solution was freeze-dried overnight. Before the catalytic evaluation, the as-synthesized samples were reduced in a  $\text{H}_2/\text{Ar}$  mixed gas at 700 °C (heating rate:  $2^\circ\text{C} \cdot \text{min}^{-1}$ ) for 2 h, followed by cooling to the room temperature in  $\text{H}_2/\text{Ar}$  mixed gas. Moreover, the temperature was dropped to room temperature, leading to a uniformly dispersed RuNi SAA nanoparticles embedded in rGO framework. The preparation methods of pure Ru@rGO and Ni@rGO are similar to the above, except that  $\text{NiCl}_2 \cdot 6\text{H}_2\text{O}$  or  $\text{RuCl}_3 \cdot 3\text{H}_2\text{O}$  are not added, respectively.

### 2. TOF values were calculated by the following equation

The Number of catalytic active sites was calculated by the underpotential deposition of Cu (Cu-upd) method. 0.5 M  $\text{H}_2\text{SO}_4$  + 1 mM  $\text{CuSO}_4$  solution was purged by nitrogen for 20 minutes before the tests. In order to clean the working electrode (WE), i-t curves are scanned and tested at a voltage of 0.2 -0.4V in a 0.5 M  $\text{H}_2\text{SO}_4$  solution. The Cu layer was deposited to the WE in 0.5 M  $\text{H}_2\text{SO}_4$  +1 mM  $\text{CuSO}_4$  solution, and the Cu-upd stripping voltammogram was obtained by scanning the working electrode (-0.2–0.8V vs RHE). Hence, the TOF values<sup>1</sup> can be calculated from LSV curve and number of Ru active sites as follows: **TOF=I/αFN**

I: I is the current (A) (the recorded current during the LSV measurements);

$\alpha$ : the number of electrons transferred for products formation;

F: the Faradaic constant, 96485 C mol<sup>-1</sup>;

N: the number of catalytic active sites (mol), the N can be calculated from the charge accumulation (Q) of Cu-UPD or H adsorption/desorption following the equation:  $N=Q/2F$ .

$\alpha$  is the number of transferred electrons corresponding to the semi-reaction that generates a molecular target product or consumes a molecular target reactant: the coefficient before the reaction equation e<sup>-</sup>. Since HER is a two-electron catalytic process,  $\alpha = 2$ .

### 3. Density Functional Theory Calculation

The Ni model structure was obtained from prior work.<sup>2</sup> In this study, the Vienna Ab Initio Simulation Package (VASP) and the projector augmented wave (PAW) method were employed to perform spin-polarized density functional theory (DFT) calculations.<sup>3</sup> The Perdew-Burke-Ernzerhof (PBE) functional within the generalized gradient approximation (GGA) was used to describe the electronic exchange-correlation energy.<sup>4</sup> A kinetic energy cutoff of 450 eV was applied. For structural optimizations and electron property calculations, the Brillouin zone was sampled using 7×7×7 and 3×3×1 k-point grids, respectively. The convergence criteria for electronic structure iterations were set to 10<sup>-4</sup> eV, while the force iterations were set to 0.02 eV/Å. In the z-direction, a vacuum space larger than 15 Å was employed to prevent interactions between periodic images.

The Gibbs free energy of each elementary step can be shown in the following equation.

$$\Delta G_n = \Delta E + T\Delta S - ZPE$$

Where  $G$  is the Gibbs free energy,  $E$  is the electronic energy from DFT calculations,  $ZPE$  is zero-point energy,  $T$  is temperature of 300 K, and  $\Delta S$  is the change in entropy.

#### 4. Supplementary Figures and Tables

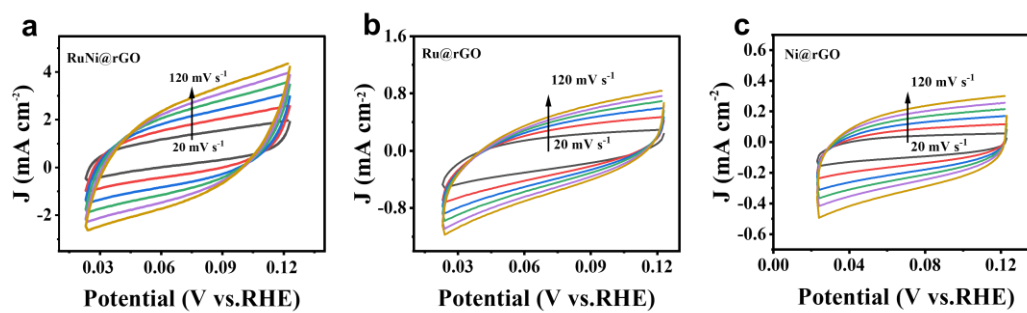

**Figure S1** Current difference at different scan rate for the estimation of double-layered capacitance of (a), (b) and (c) for HER in 1 M KOH.

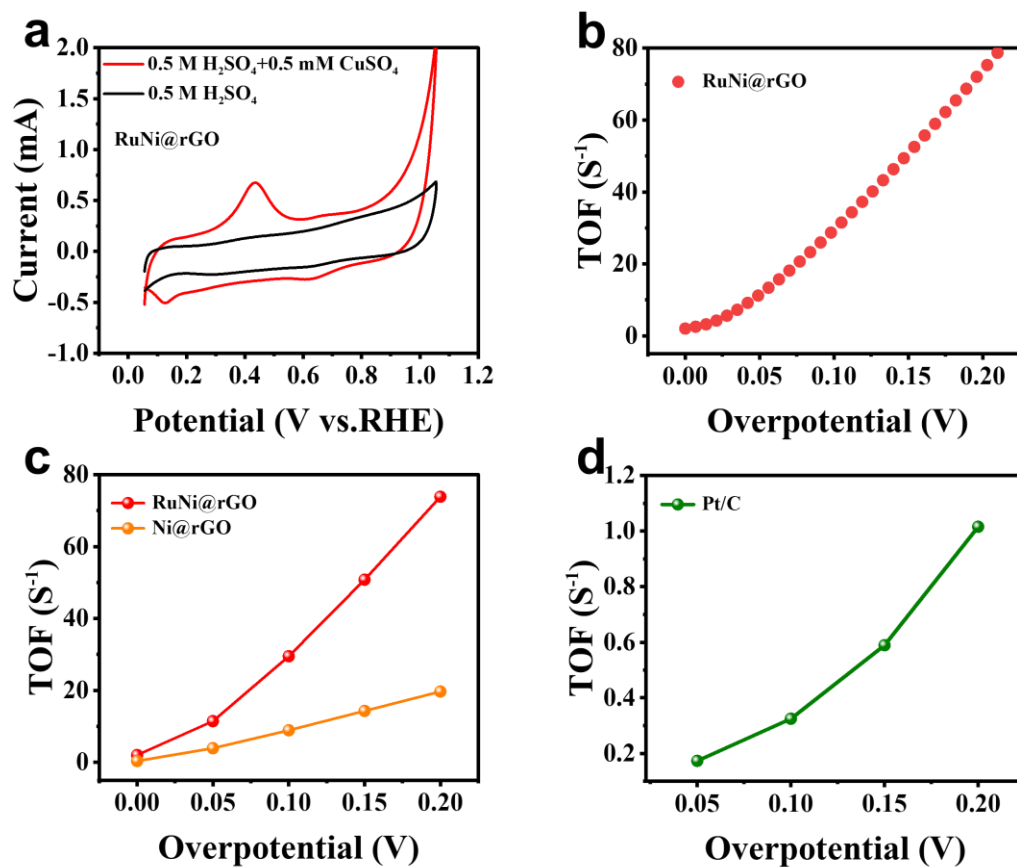

**Figure S2** (a) Full range scan of Cu deposition and splitting on RuNi@rGO and Cu-upd stripping voltammogram; (b) TOFs curves of RuNi@rGO; (c and d) TOFs curves of RuNi@rGO and Ni@rGO to the HER with 20 wt% Pt/C.

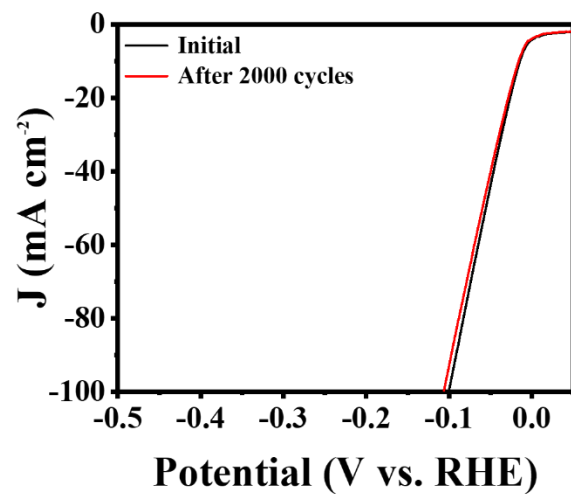

**Figure S3** Comparison of the HER polarization curve of the RuNi@rGO electrocatalyst before and after 2000th cycles.

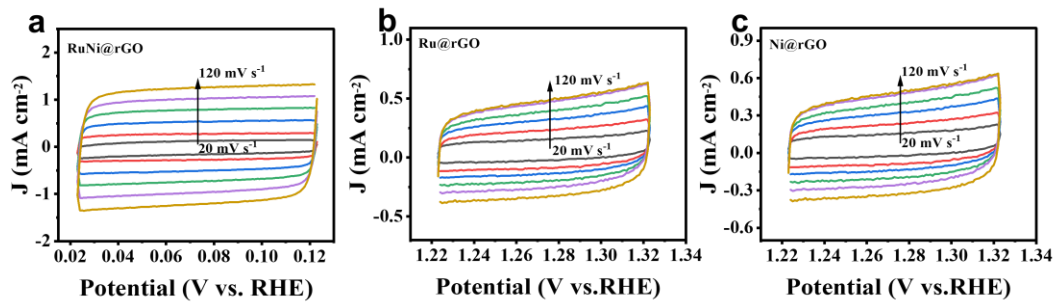

**Figure S4** Current difference at different scan rate for the estimation of double-layered capacitance of (a), (b) and (c) for OER in 1 M KOH.

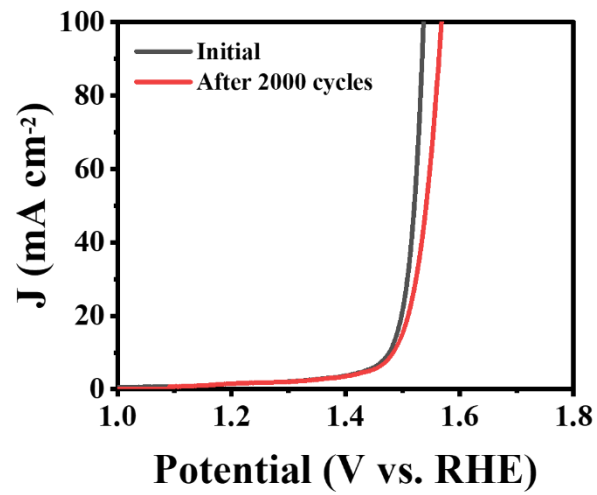

**Figure S5** Comparison of the OER polarization curve of the RuNi@rGO electrocatalyst before and after 2000th cycles.

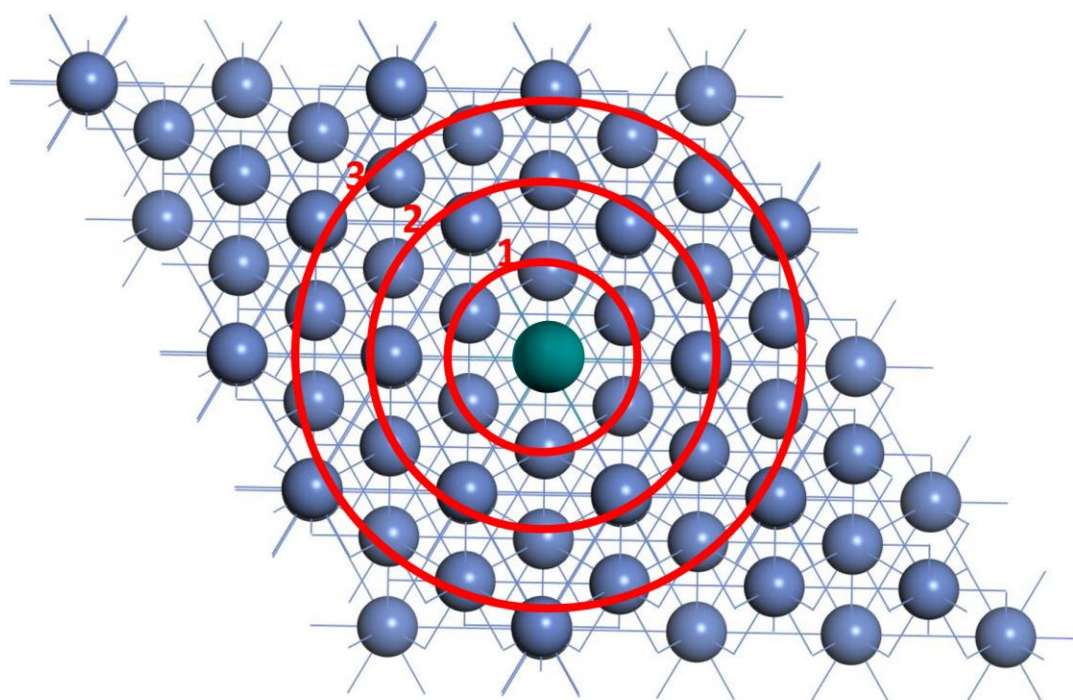

**Figure S6** the structural models of three different catalytic environments on the surface of RuNi, namely RuNi -1, RuNi-2 and RuNi-3.



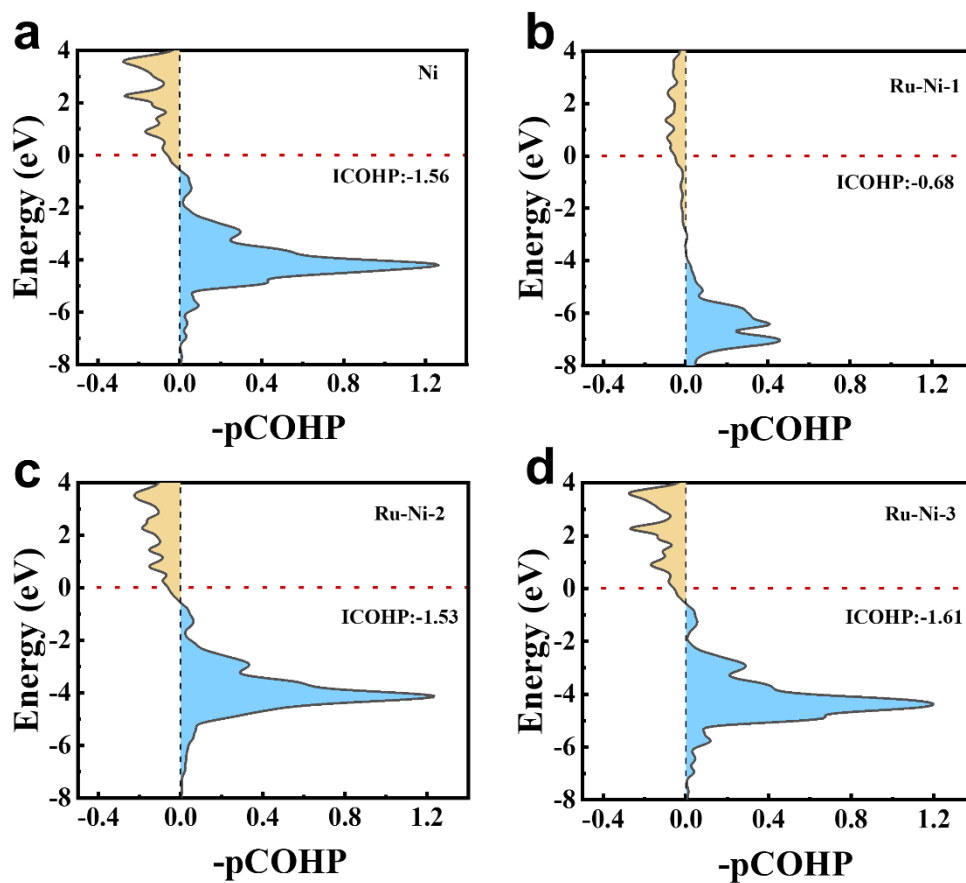

**Figure S7** (a-d) The pCOHP plots of the Ni-H, RuNi-1-H, RuNi-2-H and RuNi-3-H bond in RuNi@rGO.

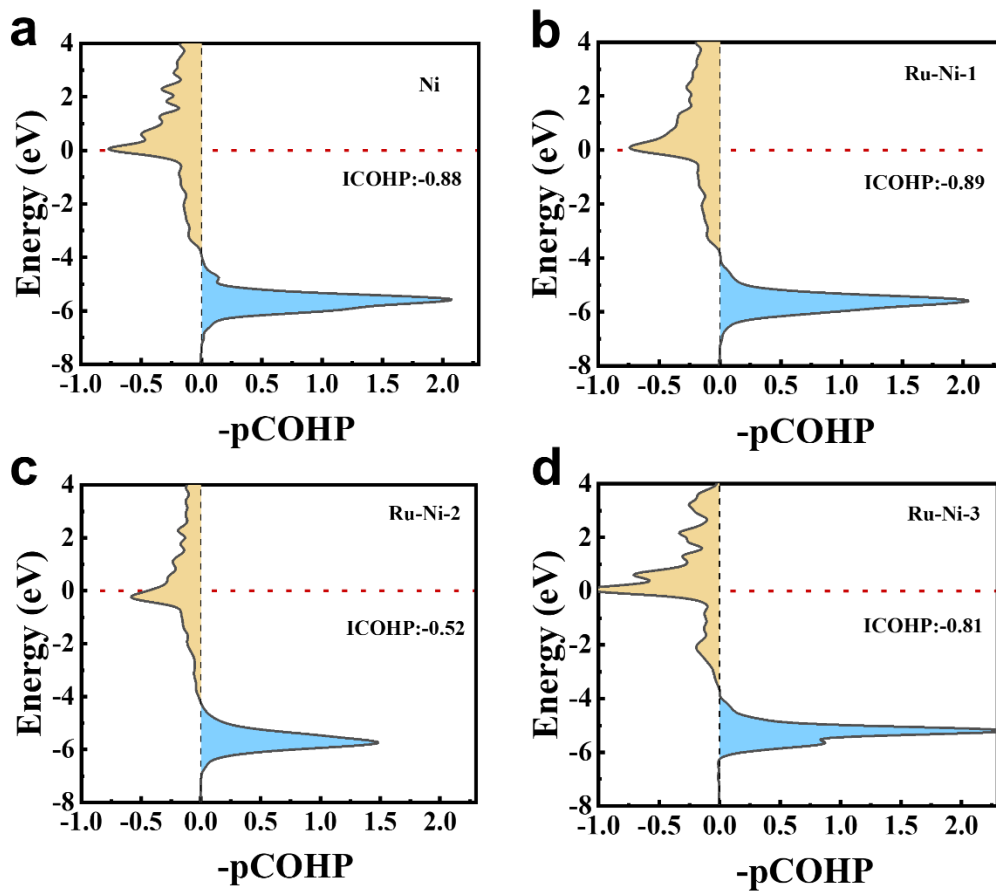

**Figure S8** (a-d) The pCOHP plots of the Ni-O、 RuNi-1-O 、 RuNi-2-O and RuNi-3-O bond in RuNi@rGO.

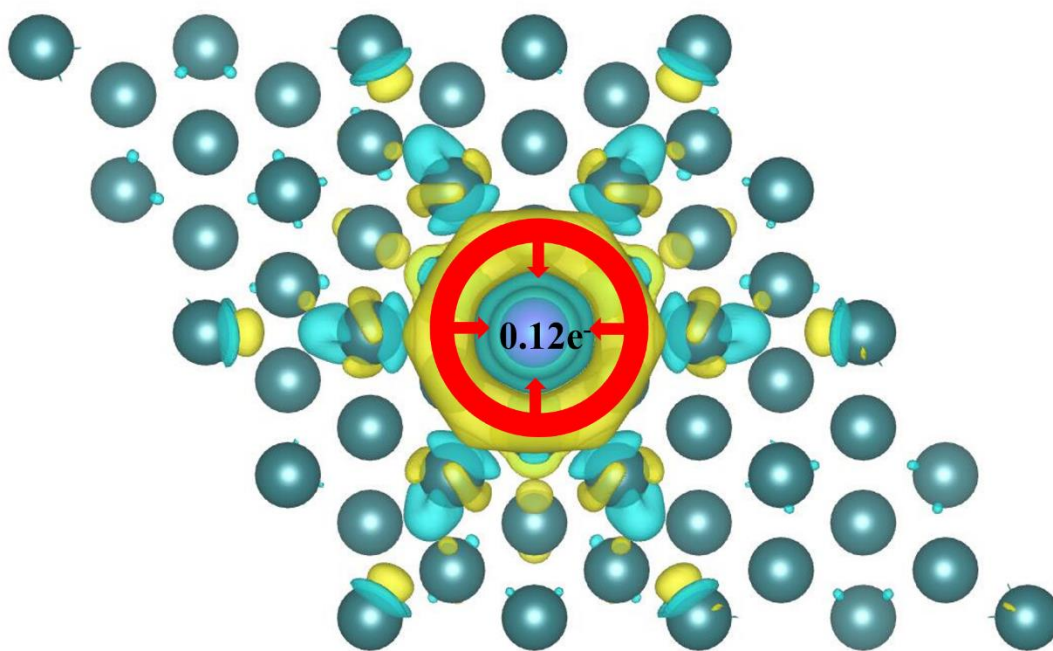

**Figure S9** Differential charge density for RuNi@rGO (the ink blue and purple ball represent the Ni and Ru, respectively).

**Table S1** Comparison of performance of bifunctional electrocatalysts in alkaline environments.

| No. | Catalyst                                         | HER $\eta_j = 10$ (mV)   | HER Tafel slop (mV dec <sup>-1</sup> ) | OER $\eta_j = 10$ (mV)     | OER Tafel slop (mV dec <sup>-1</sup> ) | Reference                                                               |
|-----|--------------------------------------------------|--------------------------|----------------------------------------|----------------------------|----------------------------------------|-------------------------------------------------------------------------|
| 1   | RuNi@rGO                                         | 14                       | 32                                     | 240                        | 57                                     | This work                                                               |
| 2   | RuNP@RuNx-OFC/NC                                 | 19                       | 35.5                                   | –                          | –                                      | Appl. Catal. B., <b>2022</b> , 307, 121193.                             |
| 3   | Ru/Co–N–C-800 ° C                                | 19                       | 27.8                                   | 276                        | 55.7                                   | Adv. Mater. <b>2022</b> , 34, 2110103.                                  |
| 4   | Ni <sub>5</sub> P <sub>4</sub> -Ru/CC            | 54                       | 52                                     | –                          | –                                      | Adv. Mater. <b>2020</b> , 32, 1906972.                                  |
| 5   | Ru/Zn <sub>3</sub> V <sub>3</sub> O <sub>8</sub> | 70                       | 50.6                                   | 250                        | 81.9                                   | Nanoscale, <b>2021</b> , 13, 17457-17464.                               |
| 6   | Ru <sub>2</sub> Ni <sub>2</sub> SNs/C            | –                        | –                                      | 310                        | 75                                     | Nano Energy <b>2018</b> , 47, 1.                                        |
| 7   | Ru@Co/N-CNTs-2                                   | 48                       | 33                                     | –                          | –                                      | ACS Sustainable Chem. Eng. <b>2020</b> , 8, 9136.                       |
| 8   | RuNi-NCNFs                                       | –                        | –                                      | 290                        | –                                      | Adv. Sci. <b>2020</b> , 7, 1901833.                                     |
| 9   | Ru@NC                                            | 26                       | 36                                     | –                          | –                                      | Angew. Chem., Int. Ed. <b>2018</b> , 57, 5848.                          |
| 10  | RuSx/S-GO                                        | 58                       | 56                                     | –                          | –                                      | Small, <b>2019</b> , 15, 1904043                                        |
| 11  | NiRu@NC                                          | 53                       | 38                                     | –                          | –                                      | Dalton Trans., <b>2020</b> , 49, 13647-13654                            |
| 12  | RuNi/MoC@NC                                      | 13                       | 49.4                                   | –                          | –                                      | Nanoscale, <b>2023</b> , 15, 16403-16412                                |
| 13  | RuNi-alloy@SC                                    | 93                       | 96                                     | –                          | –                                      | Chemical Engineering Journal, 417 ( <b>2021</b> ) 129319                |
| 14  | Ni <sub>2</sub> P-Fe <sub>2</sub> P/NF           | –                        | –                                      | 222@100mA cm <sup>-2</sup> | 40.9                                   | Sustainable Energy Fuels, <b>2022</b> , 6, 4477-4483                    |
| 15  | Co/Ru SAs-N-C                                    | –                        | –                                      | 450@100mA cm <sup>-2</sup> | –                                      | Catal. Sci. Technol., <b>2022</b> , 12, 5435-5441                       |
| 16  | Ru <sub>2</sub> Ni <sub>2</sub> SNs/C            | –                        | –                                      | 310                        | 75                                     | Nano Energy , <b>2018</b> , 47, 1.                                      |
| 17  | 2% Ru-NCO                                        | –                        | –                                      | 269@100mA cm <sup>-2</sup> | –                                      | Chemical Engineering Journal 439 (2022) 135634                          |
| 18  | NiCo.c                                           | 85@50mA cm <sup>-2</sup> | 182@50mA cm <sup>-2</sup>              | 290@20mA cm <sup>-2</sup>  | 149                                    | Energy Conversion and Management, 254 ( <b>2022</b> ) 115262            |
| 19  | ac-NiCo(OH) <sub>2</sub> /NF                     | –                        | –                                      | 320@100mA cm <sup>-2</sup> | –                                      | Journal of Colloid and Interface Science, 653 ( <b>2024</b> ) 1704–1714 |

**Table S2** The TOF of RuNi@rGO compared with other recently reported metal-based electrocatalysts in 1 M KOH.

| No. | Catalyst                     | TOF (H <sub>2</sub> s <sup>-1</sup> ) | Mass activity (A mg <sup>-1</sup> ) | Reference                                     |
|-----|------------------------------|---------------------------------------|-------------------------------------|-----------------------------------------------|
| 1   | RuNi@rGO                     | 11.45@50mV                            | 29@100mV                            | This work                                     |
| 2   | Ru-MoS <sub>2</sub> /CC      | –                                     | 0.2@169 mV                          | Appl. Catal. B., <b>2019</b> , 249, 91-97.    |
| 3   | Pt-SAs/MoSe <sub>2</sub>     | 6.21@50 mV                            | 34.4@100 mV                         | Nat. Commun. <b>2021</b> , 12,3021.           |
| 4   | RuNP-RuSA@CFN-800            | –                                     | 11.1@100 mV                         | Adv. Funct. Mater. <b>2023</b> , 33, 2213058. |
| 5   | Ru@C <sub>2</sub> N          | 1.95@50 mV                            | –                                   | Nat. Nanotech., <b>2017</b> , 12, 441–446.    |
| 6   | Ru/N-C                       | 0.7@50 mV                             | –                                   | J. Mater. Chem. A, 2017, 5, 25314–25318.      |
| 7   | PtSA/α-MoC <sub>1-x</sub> @C | 11.61@50 mV                           | 26.65@100 mV                        | Adv. Funct. Mater. <b>2021</b> , 2108464.     |
| 8   | Pt-SAs/MoSe <sub>2</sub>     | 6.21@50 mV                            | 34.4@100 mV                         | Nat. Commun. <b>2021</b> , 12,3021.           |
| 9   | Pt-Ni ASSs                   | 18.63@50 mV                           | 2.80@70 mV                          | Adv. Mater., <b>2018</b> , 30, 1801741.       |

## References

- 1 Q. He, Y. Zhou, H. Shou, X. Wang, P. Zhang, W. Xu, S. Qiao, C. Wu, H. Liu, D. Liu, S. Chen, R. Long, Z. Qi, X. Wu and L. Song, *Adv. Mater*, 2022, **34**, 2110604.
- 2 J. Liu, J. Wang, Y. Fo, B. Zhang, C. Molochas, J. Gao, W. Li, X. Cui, X. Zhou, L. Jiang and P. Tsiakaras, *Chem. Eng. J*, 2023, **454**, 139959.
- 3 G. Kresse and J. Furthmüller, *Comput. Mater. Sci.*, 1996, **6**, 15-50.
- 4 Kresse and Furthmuller, *Phys. Rev.,B Condens.Matter*, 1996, **54**, 11169-11186.
